# Supplementary material for: Layer-by-layer assembly of inorganic–organic molybdovanadogermanic (GeMoV)-polyluminol composite electrodes for capacitive charge storage
Source: Royal Society of Chemistry journal article supplement (doi:10.1039/d0ta04954a), 2020-01-01
Supplement: d0ta04954a1.pdf [file d0ta04954a1.pdf]

## Supplementary Information

### **Layer-by-Layer Assembly of Inorganic-Organic Molybdovanadogermanic (GeMoV)-Polyluminol Composite Electrodes for Capacitive Charge Storage**

Jeanne N'Diaye<sup>1\*</sup>, Shaheer Sidiqqi<sup>1</sup>, Pak Kin Long<sup>1</sup>, and Keryn Lian<sup>1\*</sup>

<sup>1</sup>Department of materials science and engineering

University of Toronto

184 College St, Toronto, ON M5S 3E4

\*Corresponding author:

[jeanne.ndiaye@mail.utoronto.ca](mailto:jeanne.ndiaye@mail.utoronto.ca),  
[keryn.lian@utoronto.ca](mailto:keryn.lian@utoronto.ca)

**Table S 1:** Comparison of the volumetric capacitance of CNT modified with P, Ge, and Si containing Keggin type polyoxometalate composite electrodes.

| Materials                                                                                                        | Capacitance                                                             | Cycling Stability       | Voltage window ( $\Delta V$ ) $\pm$ | Ref       |
|------------------------------------------------------------------------------------------------------------------|-------------------------------------------------------------------------|-------------------------|-------------------------------------|-----------|
| PMo-PDDA-CNT                                                                                                     | 84 F/cm <sup>3</sup> at 50 mV/s                                         | -                       | 0.58                                | 1         |
| PMoV <sub>2</sub> -PDDA-CNT                                                                                      | 88 F/cm <sup>3</sup> at 50 mV/s                                         | -                       | 0.65                                | 1         |
| PMo-PDDA-CNT                                                                                                     | 0.4 F/cm <sup>2</sup> at 5 mV/s                                         | -                       | 0.55                                | 2         |
| PMo-CNT                                                                                                          | -                                                                       | -                       | 0.55                                | 3         |
| PMo-AC                                                                                                           | -                                                                       | 91 %<br>(8000 cycles)   | 0.65                                | 4         |
| GeMo-PPDA-CNT                                                                                                    | 109 F/cm <sup>3</sup> at 50 mV/s<br>41.9 mF/cm <sup>2</sup> at 1V/s     | 93.7 %<br>(5000 cycles) | 0.55                                | 5         |
| SiMo-PDDA-CNT                                                                                                    | 111.2 F/cm <sup>3</sup> at 50 mV/s                                      | -                       | 0.5                                 | 5         |
| PMo-p-EVIM-Br <sup>+</sup> -CNT                                                                                  | 102.1 F/cm <sup>3</sup> at 100 mV/s                                     | -                       | 0.45                                | 6         |
| GeMoV-PDDA-CNT                                                                                                   | 72.4 F/cm <sup>3</sup> at 100 mV/s<br>(35.6 mF/cm <sup>2</sup> at 1V/s) | 77%<br>(4000 cycles)    | 0.77                                | This work |
| GeMoV-CpLum-CNT                                                                                                  | 66.3 F/cm <sup>3</sup> at 100 mV/s<br>(32.05mF/cm <sup>2</sup> at 1V/s) | 87 %<br>(4000 cycles)   | 0.9                                 |           |
| GeMoV-PDDA-CpLum-CNT                                                                                             | 80.7 F/cm <sup>3</sup> at 100 mV/s<br>(83.6 mF/cm <sup>2</sup> at 1V/s) | 83 %<br>(4000 cycles)   | 0.9                                 |           |
| *1-ethyl-3-vinylimidazolium bromide (p-EVIM-Br)<br>$\pm$ Windows of redox activity measured from literature data |                                                                         |                         |                                     |           |

**Table S 2:** The peak position for CNT coated with GeMoV-PDDA , CpLum, GeMoV-CpLum, and GeMoV-PDDA-CpLum .

|                  | E <sub>ox</sub> Position (V) |         |          |         |         |         | CpLum            |
|------------------|------------------------------|---------|----------|---------|---------|---------|------------------|
|                  | Peak I                       | Peak II | Peak III | Peak IV | Peak Va | Peak Vb |                  |
| GeMoV-PDDA       | -0.08                        | 0.08    | 0.22     | 0.29    | 0.38    | 0.59    |                  |
| CpLum            |                              |         |          |         |         |         | 0.36, 0.46, 0.64 |
| GeMoV-CpLum      | -0.07                        | 0.08    | 0.23     | 0.29    | 0.40    | -       | 0.62             |
| GeMoV-PDDA-CpLum | -0.07                        | 0.09    | Sh       | 0.29    | 0.39    | -       | 0.62             |

**Table S 3:** Peak to peak separation for GeMoV-PDDA, GeMoV-CpLum , and GeMoV-PDDA-CpLum at 100 mV/s.

|                  | Peak Separation (mV) |          |         |         |         | Peak VI<br>(CpLum) |
|------------------|----------------------|----------|---------|---------|---------|--------------------|
|                  | Peak II              | Peak III | Peak IV | Peak Va | Peak Vb |                    |
| CpLum            | -                    | -        | -       | -       | -       | 100                |
| GeMoV-PDDA       | 46                   | 38       | -       | 47      | 14      | -                  |
| GeMoV-CpLum      | 26                   | 22       | 10      | 31      | -       | 56                 |
| GeMoV-PDDA-CpLum | 48                   | 49       | *Sh     | 45      | -       | 56                 |

### Supplementary figure 1

The X-ray powder diffraction was conducted on GeMoV to confirm the Keggin structure of the synthesized materials. The XRD pattern of GeMoV is compared to that of GeMo in **Figure S1a**. Typical features of the Keggin structure were observed for both materials at  $2\theta$  between  $7.3^\circ$  and  $9^\circ$  and  $26.7^\circ$ <sup>1, 7, 8</sup>, indicating the successful synthesis of GeMoV crystals. The Raman spectrum of GeMoV was also recorded and compared to GeMo as seen in **Figure S1b**). Both spectra had bands at  $281.17\text{-}331.69\text{ cm}^{-1}$  (Mo-o),  $661.5\text{ cm}^{-1}$  (Mo-O-Mo),  $815.4\text{ cm}^{-1}$  (Mo=O), and  $990\text{ cm}^{-1}$  (GeMo). However, the GeMoV had an additional Raman shoulder at  $843\text{ cm}^{-1}$  that may be attributed to the V=O signal.

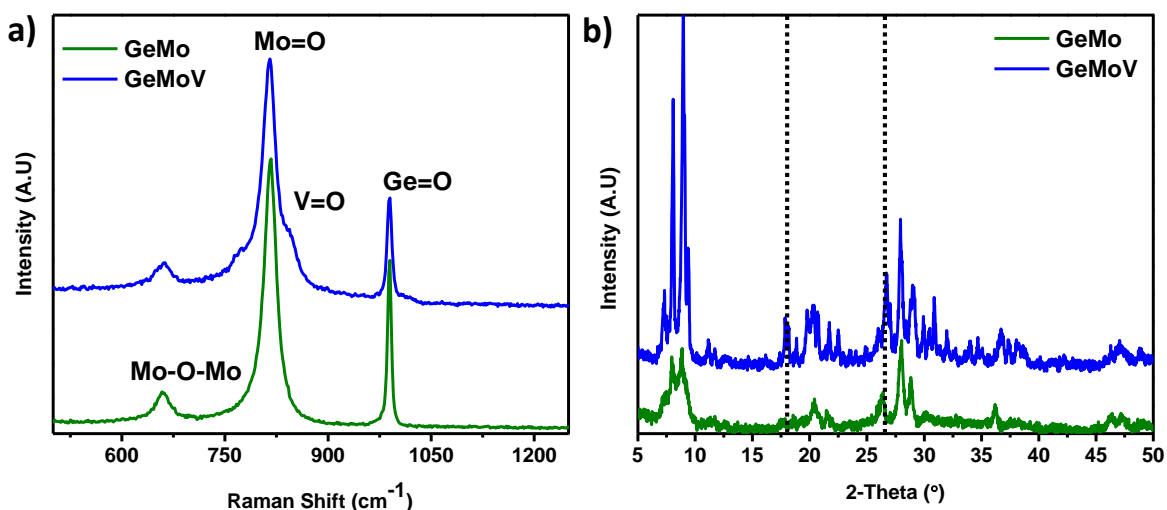

**Figure S 1:** Comparison of a) Raman spectra and b) XRD pattern of GeMoV vs GeMo

## Supplementary figure 2

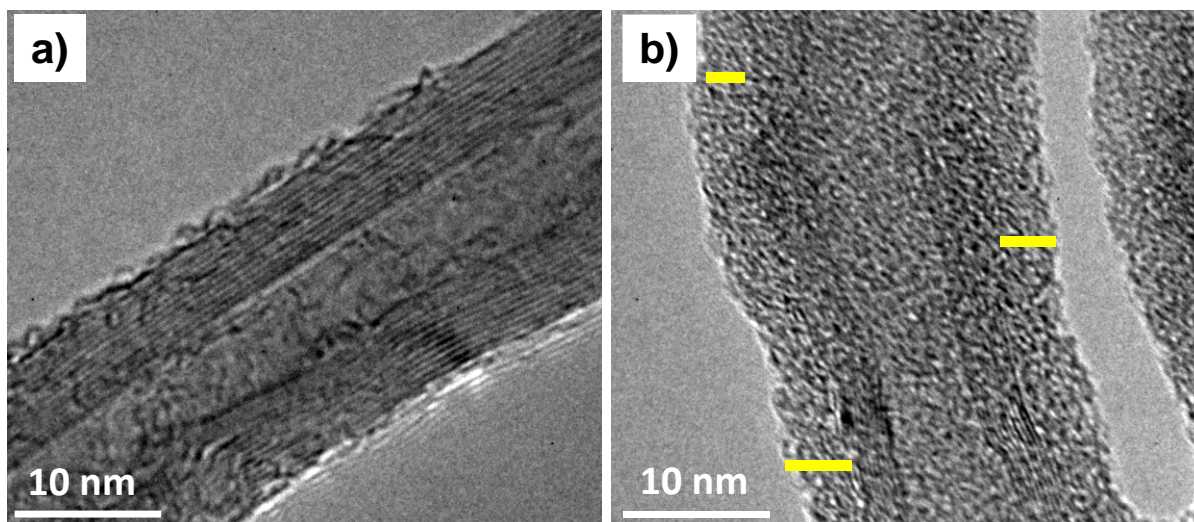

**Figure S 2:** HRTEM images of a) unmodified CNT and b) GeMo-PDDA-CpLum-CNT composite.

## Supplementary figure 3

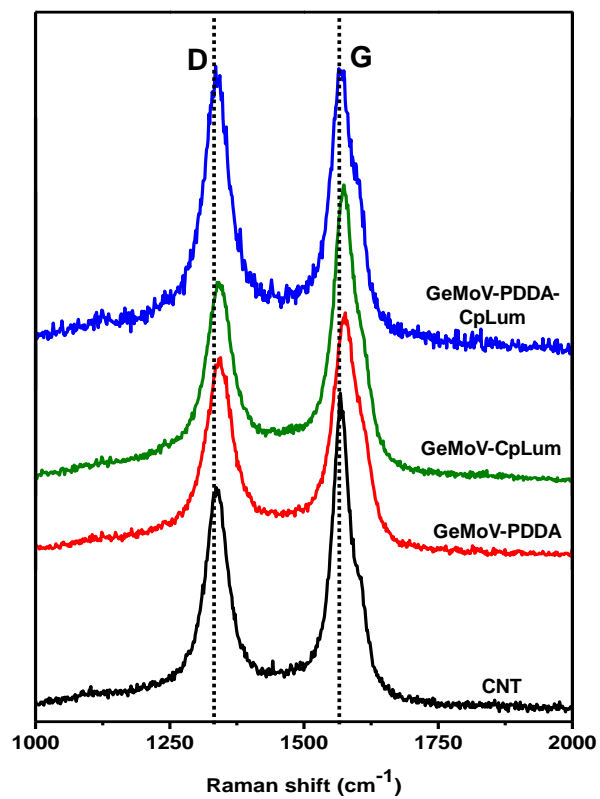

**Figure S 3:** Raman spectra of bare CNT and CNT modified with: GeMoV-PDDA, GeMoV-CpLum, and GeMoV-PDDA-CpLum.

## Supplementary figure 4

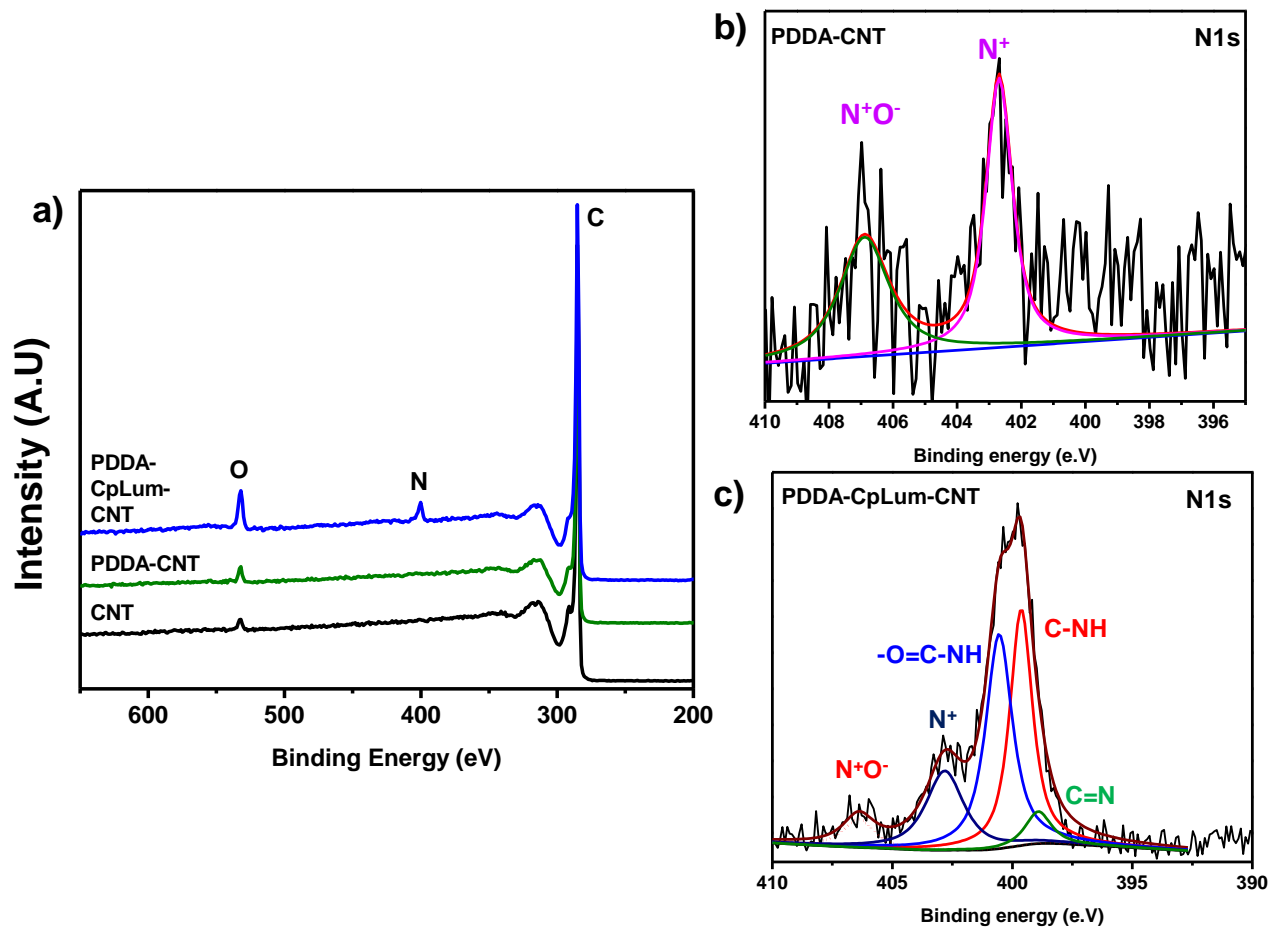

**Figure S 4:** a) and XPS survey spectra, b and c) High resolution N1s XPS spectra for PDDA-CNT and PDDA-CpLum-CNT, and d) high resolution O1s spectra for CNT modified with PDDA, PDDA-CpLum, GeMoV-PDDA , GeMoV-CpLum and GeMoV-PDDA-CpLum.

## Supplementary figure 5

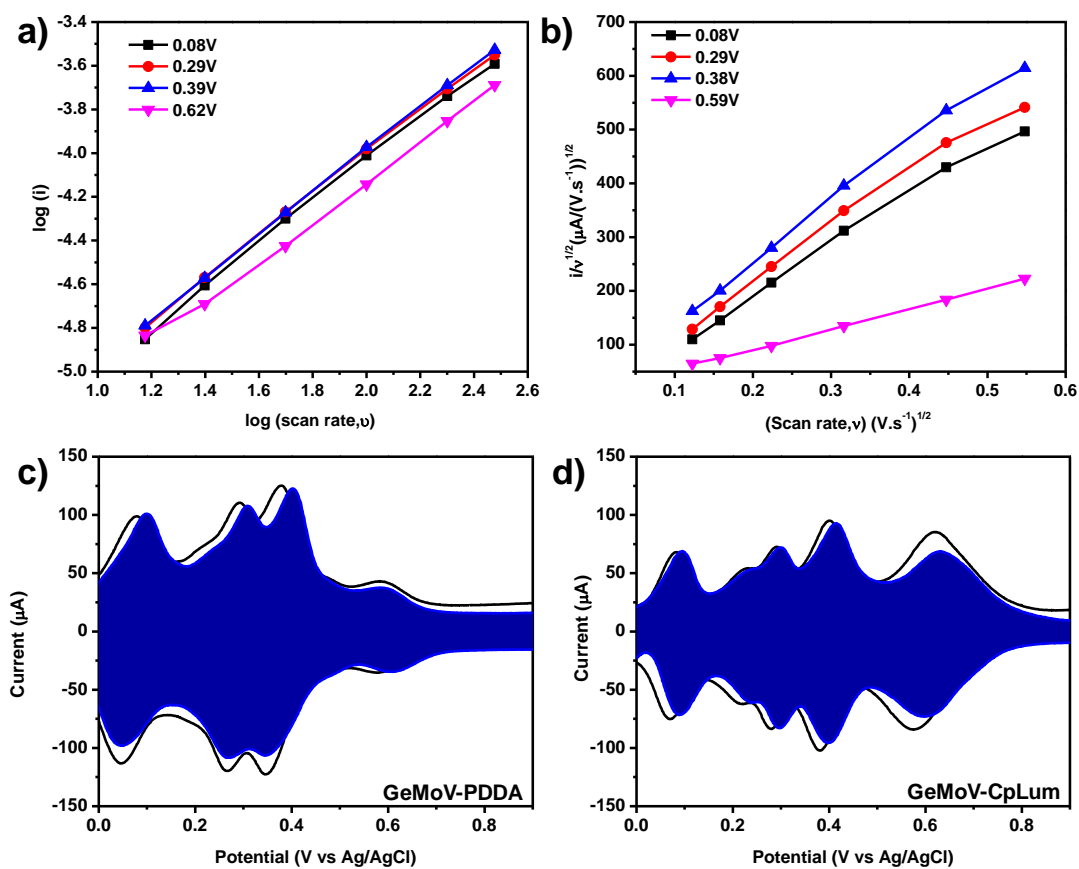

**Figure S 5:** Example of extrapolated curve for GeMoV-PDDA-CpLum-CNT with a)  $\log(i)$  vs  $\log(\text{scan rate})$ , b) Current vs square root of scan rates from equation 2, and c and d) CV curve for capacitive contribution for CNT: GeMoV-PDDA and GeMoV-CpLum at 100 mV/s.

## Supplementary figure 6

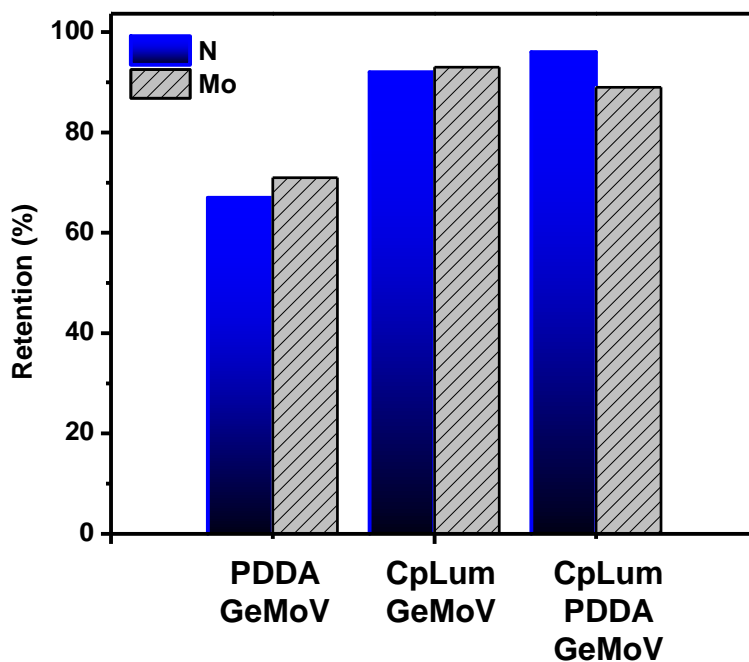

**Figure S 6:** Mo and N retention after 4000 cycles for CNT modified with GeMoV-PDDA , GeMoV-CpLum and GeMoV-PDDA-CpLum.

### References:

1. G. Bajwa, M. Genovese and K. Lian, *ECS Journal of Solid State Science and Technology*, 2013, **2**, M3046-M3050.
2. S. Park, K. Lian and Y. Gogotsi, *Journal of The Electrochemical Society*, 2009, **156**, A921.
3. M. Skunik, M. Chojak, I. A. Rutkowska and P. J. Kulesza, *Electrochimica Acta*, 2008, **53**, 3862-3869.
4. V. Ruiz, J. Suárez-Guevara and P. Gomez-Romero, *Electrochemistry Communications*, 2012, **24**, 35-38.
5. M. Genovese, Y. W. Foong and K. Lian, *Electrochimica Acta*, 2014, **117**, 153-158.
6. M. Genovese and K. Lian, *ACS Applied Materials & Interfaces*, 2016, **8**, 19100-19109.
7. J. Arichi, M. M. Pereira, P. M. Esteves and B. Louis, *Solid State Sciences*, 2010, **12**, 1866-1869.
8. C. Komintarachat and W. Trakarnpruk, *Industrial & Engineering Chemistry Research*, 2006, **45**, 1853-1856.
